# Supplementary material for: Federally-Assisted Healthcare Coverage among Male State Prisoners with Chronic Health Problems
Source: PubMed Central journal article supplement (PMC4968827; doi:10.1371/journal.pone.0160085), 2016-08-01
Supplement: pone.0160085.s001.pdf [file pone.0160085.s001.pdf]

**S1 Appendix. Survey items utilized in the analysis of healthcare coverage eligibility among US male state prisoners with chronic health conditions**

| Domain             | Variable | Item                                                                                                                                                                                                                                                                                                                                                                                                                                                                                                                                                                      |
|--------------------|----------|---------------------------------------------------------------------------------------------------------------------------------------------------------------------------------------------------------------------------------------------------------------------------------------------------------------------------------------------------------------------------------------------------------------------------------------------------------------------------------------------------------------------------------------------------------------------------|
| Socio-demographics | V0004    | SEX<br>Location: 14-14 (width: 1; decimal: 0)<br>Interval: discrete<br>Question: S1Q1<br>Label Value<br>Male 1<br>Female 2<br>Blank 9 (M)                                                                                                                                                                                                                                                                                                                                                                                                                                 |
| Socio-demographics | V0014    | AGE (ALLOCATED)<br>Location: 35-37 (width: 3; decimal: 0)<br>Interval: continuous<br>Range of Valid Data Values: 000 thru 996<br>Question: AGE                                                                                                                                                                                                                                                                                                                                                                                                                            |
| Socio-demographics | V2982    | RACEHISP: Race and Hispanic Origin of Inmate<br>Location: 8840-8840 (width: 1; decimal: 0)<br>Interval: discrete<br>Question: RACEHISP: Race and Hispanic Origin of Inmate Question:<br>Value Label<br>1 White non-Hispanic<br>2 Black non-Hispanic<br>3 Hispanic<br>4 American Indian, Alaska Native non-Hispanic<br>5 Asian, Pacific Islander, Native Hawaiian non-Hispanic<br>6 Multiple Races reported, non-Hispanic<br>8 Other, Uncategorized - Missing                                                                                                              |
| Socio-demographics | V1740    | S7Q1A: BEFORE ADMISSION, HIGHEST GRADE OF SCHOOL ATTENDED<br>Location: 4479-4480 (width: 2; decimal: 0)<br>Interval: discrete<br>Question: S7Q1A: This group of questions concerns your education, employment, and income. S7Q1A: This group of questions concerns your education, employment, and income. Before your admission on [MOST RECENT ADMISSION DATE], what was the highest grade of school that you ever attended?<br>[Response options not shown]                                                                                                            |
| Socio-demographics | V1777    | S7Q6A_1: BEFORE ARREST LIVING IN A -<br>Location: 4546-4547 (width: 2; decimal: 0)<br>Interval: discrete<br>Question: S7Q6A_1: Before your arrest [CONTROLLING ARREST DATE], were you living in a -<br>Value Label<br>01 House?<br>02 Apartment?<br>03 Trailer or mobile home?<br>04 Rooming-house, hotel or motel?<br>05 On the street or in a homeless shelter?<br>In a group living situation or institution, such as a hospital, halfway house, recovery room, dormitory, etc.<br>06<br>07 In another type of housing?<br>97 Don't know<br>98 Refused<br>99 (M) Blank |

|                            |       |                                                                                                                                                                                                                                                                                                                                                                                                                                                                                                                                                                                                                                                                                                                                    |
|----------------------------|-------|------------------------------------------------------------------------------------------------------------------------------------------------------------------------------------------------------------------------------------------------------------------------------------------------------------------------------------------------------------------------------------------------------------------------------------------------------------------------------------------------------------------------------------------------------------------------------------------------------------------------------------------------------------------------------------------------------------------------------------|
| Pre-incarceration income   | V1857 | <p>S7Q11C: MONTH BEFORE ARREST MONTHLY INCOME</p> <p>Location: 4679-4680 (width: 2; decimal: 0)</p> <p>Interval: discrete</p> <p>Question: S7Q11C: Which category on this card represents your personal monthly income from ALL sources for the month before your arrest, that is, from [MONTH] 1st to [MONTH] [28-31], [YEAR].</p> <p>Question:</p> <p>Value Label</p> <p>00 No income</p> <p>01 \$1 - 199</p> <p>02 200 - 399</p> <p>03 400 - 599</p> <p>04 600 - 799</p> <p>05 800 - 999</p> <p>06 1,000 - 1,199</p> <p>07 1,200 - 1,499</p> <p>08 1,500 - 1,999</p> <p>09 2,000 - 2,499</p> <p>10 2,500 - 4,999</p> <p>11 5,000 - 7,499</p> <p>12 7,500 or more</p> <p>97 Don't know</p> <p>98 Refused</p> <p>99 (M) Blank</p> |
| Pre-incarceration benefits | V1847 | <p>S7Q11A1_2: MONTH BEFORE ARREST RECEIVED INCOME FROM SSI/SSDI</p> <p>Location: 4669-4669 (width: 1; decimal: 0)</p> <p>Interval: discrete</p> <p>Question: S7Q11A1_2: During the month before your arrest, from [MONTH] 1st to [MONTH] [28-31], [YEAR], did you personally receive any money/income from - Social security or supplemental security income (SSI), or Social Security Disability Insurance (SSDI)?</p> <p>Question:</p> <p>Value Label</p> <p>1 Yes</p> <p>2 No</p> <p>7 Don't know</p> <p>8 Refused</p> <p>9 (M) Blank</p>                                                                                                                                                                                       |
| Pre-incarceration benefits | V1858 | <p>S7Q11D: RECEIVED INCOME FROM SOCIAL SECURITY</p> <p>Location: 4681-4681 (width: 1; decimal: 0)</p> <p>Interval: discrete</p> <p>Question: S7Q11D: Have you ever received income from Social Security as a result of a retirement, survivors, or disability benefit?</p> <p>Question:</p> <p>Value Label</p> <p>1 Yes</p> <p>2 No</p> <p>7 Don't know</p> <p>8 Refused</p> <p>9 (M) Blank</p>                                                                                                                                                                                                                                                                                                                                    |
| State                      | V1057 | <p>S5Q15A_ST: AT ARREST - RESIDENCE (STATE)</p> <p>Location: 2999-3000 (width: 2; decimal: 0)</p> <p>Interval: discrete</p> <p>Question: S5Q15A_ST: At the time of your arrest [CONTROLLING ARREST DATE], in what city or place did you live? (State)</p> <p>[Options not shown]</p>                                                                                                                                                                                                                                                                                                                                                                                                                                               |
| Health Conditions          | V2289 | <p>S9Q4C: RESULT OF LAST (HIV) TEST</p> <p>Location: 5243-5243 (width: 1; decimal: 0)</p> <p>Interval: discrete</p> <p>Question: S9Q4C: What was the result of the last test you had?</p> <p>Value Label</p> <p>1 Positive (infected with the AIDS virus)</p> <p>2 Negative (not infected)</p> <p>3 Result not available yet</p> <p>7 Don't know</p> <p>8 Refused</p> <p>9 (M) Blank</p>                                                                                                                                                                                                                                                                                                                                           |

|                   |       |                                                                                                                                                                                                                                                                                                                                                                                    |
|-------------------|-------|------------------------------------------------------------------------------------------------------------------------------------------------------------------------------------------------------------------------------------------------------------------------------------------------------------------------------------------------------------------------------------|
| Health Conditions | V2319 | <p>S9Q6A: EVER HAD CANCER<br/> Location: 5289-5289 (width: 1; decimal: 0)<br/> Interval: discrete<br/> Question: S9Q6A: Have you EVER had any type of cancer?<br/> Value Label<br/> 1 Yes<br/> 2 No<br/> 7 Don't know<br/> 8 Refused<br/> 9 (M) Blank</p>                                                                                                                          |
| Health Conditions | V2335 | <p>S9Q6B: EVER EXPERIENCED PARALYSIS<br/> Location:5317-5317 (width: 1; decimal: 0)<br/> Interval: discrete<br/> S9Q6B: Have you ever been paralyzed or unable to move your legs, arms, or other areas of your body? Do not include times when you may have been held down or tied up.<br/> Value Label<br/> 1 Yes<br/> 2 No<br/> 7 Don't know<br/> 8 Refused<br/> 9 (M) Blank</p> |
| Health Conditions | V2336 | <p>S9Q6C: EVER HAD HYPERTENSION<br/> Location:5320-5320 (width: 1; decimal: 0)<br/> Interval: discrete<br/> S9Q6C: Have you ever had high blood pressure or hypertension?<br/> Value Label<br/> 1 Yes<br/> 2 No<br/> 7 Don't know<br/> 8 Refused<br/> 9 (M) Blank</p>                                                                                                              |
| Health Conditions | V2341 | <p>S9Q6E: EVER HAD DIABETES<br/> Location: 5326-5326 (width: 1; decimal: 0)<br/> Interval: discrete<br/> Question: S9Q6E: Have you ever had diabetes or high blood sugar? Question:<br/> Label Value<br/> Yes 1<br/> No 2<br/> Don't know 7<br/> Refused 8<br/> Blank 9 (M)</p>                                                                                                    |
| Health Conditions | V2347 | <p>S9Q6F: EVER HAD HEART PROBLEMS<br/> 5329-5329 (width: 1; decimal: 0) Location:<br/> discrete Interval:<br/> Question S9Q6F: Have you ever had problems with your heart? Question:<br/> Label Value<br/> Yes 1<br/> No 2<br/> Don't know 7<br/> Refused 8<br/> Blank 9 (M)</p>                                                                                                   |
| Health Conditions | V2360 | <p>S9Q6G: EVER HAD KIDNEY PROBLEMS<br/> 5350-5350 (width: 1; decimal: 0) Location:<br/> discrete Interval:<br/> Question S9Q6G: Have you ever had problems with your kidneys? Question:<br/> Label Value<br/> Yes 1<br/> No 2<br/> Don't know 7<br/> Refused 8<br/> Blank 9 (M)</p>                                                                                                |

|                   |       |                                                                                                                                                                                                                                                                                                                                                                                                                                                  |
|-------------------|-------|--------------------------------------------------------------------------------------------------------------------------------------------------------------------------------------------------------------------------------------------------------------------------------------------------------------------------------------------------------------------------------------------------------------------------------------------------|
| Health Conditions | V2363 | <p>S9Q6H: EVER HAD ARTHRITIS OR RHEUMATISM<br/> 5353-5353 (width: 1; decimal: 0) Location:<br/> discrete Interval:<br/> Question S9Q6H: Have you ever had arthritis or rheumatism? Question:<br/> Label Value<br/> Yes 1<br/> No 2<br/> Don't know 7<br/> Refused 8<br/> Blank 9 (M)</p>                                                                                                                                                         |
| Health Conditions | V2366 | <p>S9Q6I: EVER HAD ASTHMA<br/> (width: 1; decimal: 0) Location: 5356-5356<br/> discrete Interval:<br/> Question S9Q6I: Have you ever had asthma? Question:<br/> Label Value<br/> Yes 1<br/> No 2<br/> Don't know 7<br/> Refused 8<br/> Blank 9 (M)</p>                                                                                                                                                                                           |
| Health Conditions | V2369 | <p>S9Q6J: EVER BEEN TOLD HAVE CIRRHOSIS<br/> Location: 5359-5359 (width: 1; decimal: 0)<br/> Interval: discrete<br/> Question S9Q6J: Have you ever been told that you have Cirrhosis of the liver? Question:<br/> Label Value<br/> Yes 1<br/> No 2<br/> Don't know 7<br/> Refused 8<br/> Blank 9 (M)</p>                                                                                                                                         |
| Health Conditions | V2372 | <p>S9Q6K: EVER BEEN TOLD HAVE HEPATITIS<br/> Location: 5362-5362 (width: 1; decimal: 0)<br/> Interval: discrete<br/> Question: S9Q6K: Have you ever been told that you have Hepatitis?<br/> Value Label<br/> 1 Yes<br/> 2 No<br/> 7 Don't know<br/> 8 Refused<br/> 9 (M) Blank</p>                                                                                                                                                               |
| Health Conditions | V2401 | <p>S9Q9A_1: EVER DIAGNOSED - A DEPRESSIVE DISORDER<br/> Location: 5391-5391 (width: 1; decimal: 0)<br/> Interval: discrete<br/> Question: S9Q9A_1: Have you ever been told by a mental health professional, such as a psychiatrist or psychologist, that you had - A depressive disorder<br/> Label Value<br/> Yes 1<br/> No 2<br/> Don't know 7<br/> Refused 8<br/> Blank 9 (M)</p>                                                             |
| Health Conditions | V2402 | <p>S9Q9A_2: EVER DIAGNOSED - MANIC-DEPRESSION, BIPOLAR DISORDER, OR MANIA<br/> Location: 5392-5392 (width: 1; decimal: 0)<br/> Interval: discrete<br/> Question S9Q9A_2: Have you ever been told by a mental health professional, such as a psychiatrist or psychologist, that you had - Manic-depression, bipolar disorder, or mania<br/> Question:<br/> Value Label<br/> 1 Yes<br/> 2 No<br/> 7 Don't know<br/> 8 Refused<br/> 9 (M) Blank</p> |

|                   |                  |                                                                                                                                                                                                                                                                                                                                                                                                                                   |
|-------------------|------------------|-----------------------------------------------------------------------------------------------------------------------------------------------------------------------------------------------------------------------------------------------------------------------------------------------------------------------------------------------------------------------------------------------------------------------------------|
| Health Conditions | V2404            | S9Q9A_4: EVER DIAGNOSED - POST-TRAUMATIC STRESS DISORDER<br>Location: 5394-5394 (width: 1; decimal: 0)<br>Interval: discrete<br>Question: S9Q9A_4: Have you ever been told by a mental health professional, such as a psychiatrist or psychologist, that you had - Post-traumatic stress disorder<br>Label Value<br>Yes 1<br>No 2<br>Don't know 7<br>Refused 8<br>Blank 9 (M)                                                     |
| Health Conditions | V2405            | S9Q9A_5: EVER DIAGNOSED - ANOTHER ANXIETY DISORDER, SUCH AS A PANIC DISORDER<br>Location: 5395-5395 (width: 1; decimal: 0)<br>Interval: discrete<br>Question S9Q9A_5: Have you ever been told by a mental health professional, such as a psychiatrist or psychologist, that you had - Another anxiety disorder, such as a panic disorder<br>Question:<br>Label Value<br>Yes 1<br>No 2<br>Don't know 7<br>Refused 8<br>Blank 9 (M) |
| Health Conditions | V2403            | S9Q9A_3: EVER DIAGNOSED - SCHIZOPHRENIA OR ANOTHER PSYCHOTIC DISORDER<br>Location: 5393-5393 (width: 1; decimal: 0)<br>Interval: discrete<br>Question S9Q9A_3: Have you ever been told by a mental health professional, such as a psychiatrist or psychologist, that you had - Schizophrenia or another psychotic disorder<br>Question:<br>Value Label<br>1 Yes<br>2 No<br>7 Don't know<br>8 Refused<br>9 (M) Blank               |
| Health Conditions | V2406            | S9Q9A_6: EVER DIAGNOSED - A PERSONALITY DISORDER<br>Location: 5396-5396 (width: 1; decimal: 0)<br>Interval: discrete<br>Question S9Q9A_6: Have you ever been told by a mental health professional, such as a psychiatrist or psychologist, that you had - A personality disorder (such as an antisocial or borderline personality disorder)<br>Value Label<br>1 Yes<br>2 No<br>7 Don't know<br>8 Refused<br>9 (M) Blank           |
| Final Weight      | V2622            | RPWTSTM0: FINAL WEIGHT (STATE MALE INMATES ONLY)<br>5843-5851 (width: 9; decimal: 4) Location:<br>discrete Interval:<br>RPWTSTM0: Final Weight (State male inmates only) Question:<br>Label Value<br>Blank 9999.9999<br>(M)                                                                                                                                                                                                       |
| Replicate Weights | V2623 -<br>V2831 | RPWTSTM1: REPLICATE WEIGHT #1 (STATE MALE INMATES ONLY)<br>discrete Interval:<br>RPWTSTM1: Replicate Weight #1 - 209 (State male inmates only)                                                                                                                                                                                                                                                                                    |

---

Source: See reference 12
